# Supplementary material
Source: Springer Nature journal article supplement (https://www.springermedizin.de/resource/supplementary/12889_2007_981_MOESM1_ESM.pdf/9502408)
Supplement: MOESM1 [file 9502408]

---

Table 1. Characteristics of participants

Individual interviews with regular patients (n = 10)

|                                |   |
|--------------------------------|---|
| <i>Gender</i>                  |   |
| - Women                        | 5 |
| - Men                          | 5 |
| <i>Age</i>                     |   |
| - 18-25                        | 3 |
| - 26-35                        | 6 |
| - 35-67                        | 1 |
| <i>Education</i>               |   |
| - Partly illiterate/illiterate | 1 |
| - 1-6 years                    | 3 |
| - 7-10 years                   | 1 |
| - 11-13 years                  | 5 |
| <i>Occupation</i>              |   |
| - Daily labourer               | 2 |
| - Civil servant                | 2 |
| - Employed in private sector   | 3 |
| - Other                        | 3 |

Individual interviews with patients who had interrupted treatment (n =11)

|                                |   |
|--------------------------------|---|
| <i>Gender</i>                  |   |
| - Women                        | 5 |
| - Men                          | 6 |
| <i>Age</i>                     |   |
| - 18-25                        | 2 |
| - 26-35                        | 6 |
| - 36-67                        | 3 |
| <i>Education</i>               |   |
| - Partly illiterate/illiterate | 4 |
| - 1-6 years                    | 3 |
| - 7-10 years                   | 2 |
| - 11-13 years                  | 2 |
| <i>Occupation</i>              |   |
| - Daily labourer               | 3 |
| - Civil servant                | 1 |
| - Employed in private sector   | 4 |
| - Other                        | 3 |
